# Supplementary material for: Alirocumab Plus Cemiplimab in Immunorefractory NSCLC: A Single Arm Phase 2 Study
Source: Research Square preprint supplement (doi:10.21203/rs.3.rs-10011569/v1), 2026-06-24
Supplement: Supplementary file 1 [file 0759baee2dffe681208a3d9b.pdf]

**Extended Table 3. Genomic Characteristics of Responders**

| <b>Patient ID</b> | <b>TMB</b>  | <b>Mutations Detected</b>                                                                                                                                   |
|-------------------|-------------|-------------------------------------------------------------------------------------------------------------------------------------------------------------|
| DUK2201-01        | Unavailable | <i>PIK3CA P539R, PTEN H93R</i>                                                                                                                              |
| DUK2201-02        | 5           | <i>TP53 C242F, PTEN LOSS, SOX2 amplification, PIK3CA amplification, TMB 5, FGF12 amplification, NF1, BCOR loss, PRK1 amplification , TERC amplification</i> |
| DUK2201-10        | 6           | <i>PIK3CA, TP53 E204, CDKN2A/2B loss</i>                                                                                                                    |
| DUK2201-16        | Unavailable | <i>CDKN2A, NRAS, APC, PTEN 1+ by IHC</i>                                                                                                                    |
| DUK2201-21        | Unavailable | <i>FGF amplification, CCND1 amplification, AKT1E17K, CCND1, SF3B1K666M, TERT -124 C&gt;T</i>                                                                |
