# Supplementary material for: Alirocumab Plus Cemiplimab in Immunorefractory NSCLC: A Single Arm Phase 2 Study
Source: Research Square preprint supplement (doi:10.21203/rs.3.rs-10011569/v1), 2026-06-24
Supplement: Supplementary file 2 [file 4277096d59662e688612e181.pdf]

**Table 1: Demographic and Clinical Characteristics of Patients at Baseline**

|                                                         |                   |
|---------------------------------------------------------|-------------------|
| Median Age, (Range), yr                                 | 68.7 (47.6, 90.8) |
| Sex, n (%)                                              |                   |
| Female                                                  | 27 (46.6%)        |
| Male                                                    | 31 (53.4%)        |
| Race, n (%)                                             |                   |
| Black or African American                               | 11 (19.0%)        |
| Unknown                                                 | 3 (5.2%)          |
| White                                                   | 43 (74.1%)        |
| White; Unknown                                          | 1 (1.7%)          |
| Ethnicity, n (%)                                        |                   |
| Not Hispanic or Latino                                  | 56 (96.6%)        |
| Unknown                                                 | 2 (3.4%)          |
| Smoking history, n (%)                                  |                   |
| Current smoker (currently smoking or quit < 1 year ago) | 7 (12.1%)         |
| Former smoker (quit > 1 year ago)                       | 45 (77.6%)        |
| Never smoker                                            | 6 (10.3%)         |
| ECOG, n (%)                                             |                   |
| 0                                                       | 12 (21.1%)        |
| 1                                                       | 45 (78.9%)        |
| Missing/Unknown                                         | 1 (1.7%)          |
| Histology, n (%)                                        |                   |
| Non-Squamous                                            | 33 (56.9%)        |
| Squamous cell carcinoma                                 | 25 (43.1%)        |
| Brain metastases, n (%)                                 |                   |
| No                                                      | 50 (86.2%)        |
| Yes                                                     | 8 (13.8%)         |
| Liver Metastasis, n (%)                                 |                   |
| No                                                      | 39 (67.2%)        |
| Yes                                                     | 19 (32.8%)        |
| Number of Previous Systemic Therapies, n (%)            |                   |
| 1                                                       | 21 (36.2%)        |
| 2                                                       | 21 (36.2%)        |
| 3+                                                      | 16 (27.6%)        |
| Duration of sensitivity to prior Immunotherapy, n (%)   |                   |
| <90                                                     | 12 (25.5%)        |
| ≥90                                                     | 35 (74.5%)        |
| Missing/Unknown                                         | 11 (19%)          |
| Prior radiation therapy, n (%)                          |                   |
| No                                                      | 23 (40.4%)        |
| Yes                                                     | 34 (59.6%)        |
| Missing/Unknown                                         | 1 (1.7%)          |
