# Supplementary material for: Alirocumab Plus Cemiplimab in Immunorefractory NSCLC: A Single Arm Phase 2 Study
Source: Research Square preprint supplement (doi:10.21203/rs.3.rs-10011569/v1), 2026-06-24
Supplement: Supplementary file 3 [file 55fdc55f1fc83ba0abe6aecc.pdf]

# Appendix 1. Reasons for Ineligibility

| <b>Reason patient not able to participate in trial, n (%)</b>                                        | <b>N=16</b> |
|------------------------------------------------------------------------------------------------------|-------------|
| Ineligible due to lab results                                                                        | 5 (31.3%)   |
| Ineligible due to tumor marker                                                                       | 1 (6.3%)    |
| Other Specify                                                                                        | 7 (43.8%)   |
| Withdrawal by PI for other treatment option                                                          | 2 (12.5%)   |
| Withdrawal of consent for other treatment option                                                     | 1 (6.3%)    |
|                                                                                                      |             |
| <b>Specify "Other" reason not eligible, n (%)</b>                                                    |             |
| Ineligible due to past medical history                                                               | 1 (14.3%)   |
| MD decided to forego trial because of the time between treating for brain mets and study treatment.  | 1 (14.3%)   |
| New Brain Metastases                                                                                 | 1 (14.3%)   |
| Physician decision                                                                                   | 1 (14.3%)   |
| Presence of new brain mets that are untreated                                                        | 1 (14.3%)   |
| Uncontrolled brain mets                                                                              | 1 (14.3%)   |
| Ineligible: H/O immune-mediated adrenal insufficiency & subsequent discontinuation of Pembrolizumab. | 1 (14.3%)   |
