# Supplementary material for: Alirocumab Plus Cemiplimab in Immunorefractory NSCLC: A Single Arm Phase 2 Study
Source: Research Square preprint supplement (doi:10.21203/rs.3.rs-10011569/v1), 2026-06-24
Supplement: Supplementary file 4 [file 616591876f4b3111716d011a.pdf]

# Extended Data Figure 4. Frequency of PIK3CA, PTEN or AKT1 alterations in NSCLC by histology in the TCGA Cohorts.

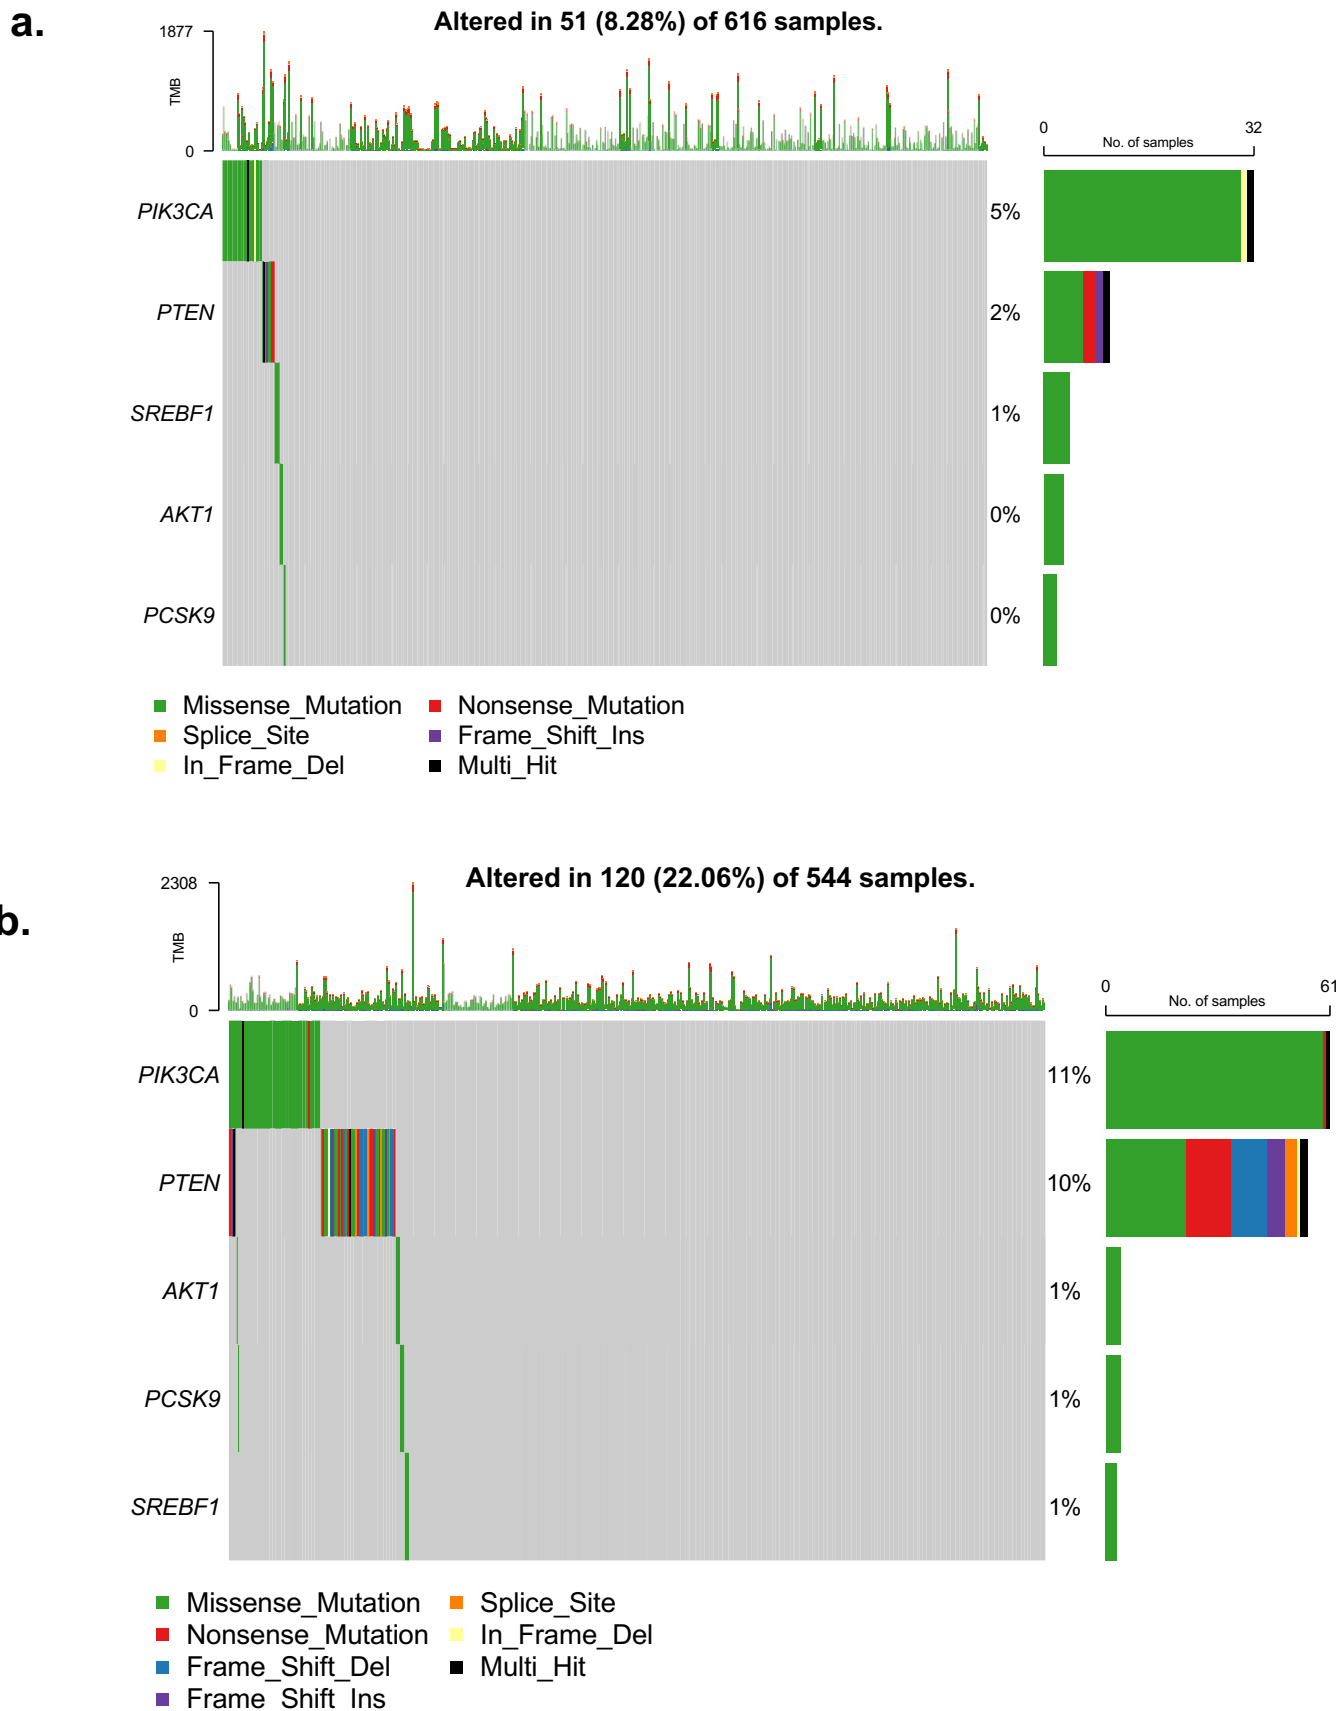

**a.** Frequency of indicated alterations in the TCGA cohort identified as lung adenocarcinoma (LUAD). **b.** Frequency of indicated alterations in the TCGA cohort identified as lung squamous (LUSC).
