# Supplementary material for: Alirocumab Plus Cemiplimab in Immunorefractory NSCLC: A Single Arm Phase 2 Study
Source: Research Square preprint supplement (doi:10.21203/rs.3.rs-10011569/v1), 2026-06-24
Supplement: Supplementary file 5 [file 6d0499e10dbde4d43796cfdb.pdf]

**Extended Table 1. All Adverse Events at least possibly related to treatment**

|                                                      | Grade of Adverse Event |      |   |     |   |     |   |     |   |     |
|------------------------------------------------------|------------------------|------|---|-----|---|-----|---|-----|---|-----|
|                                                      | 1                      |      | 2 |     | 3 |     | 4 |     | 5 |     |
|                                                      | n                      | (%)  | n | (%) | n | (%) | n | (%) | n | (%) |
| <b>Hematologic Adverse Events</b>                    |                        |      |   |     |   |     |   |     |   |     |
| Blood and lymphatic system disorders                 |                        |      |   |     |   |     |   |     |   |     |
| Anemia                                               | 6                      | -10% | 4 | -7% | 3 | -5% | 0 | 0%  | 0 | 0%  |
| <b>Non-Hematologic Adverse Events</b>                |                        |      |   |     |   |     |   |     |   |     |
| Cardiac disorders                                    |                        |      |   |     |   |     |   |     |   |     |
| Sinus tachycardia                                    | 1                      | -2%  | 0 | 0%  | 0 | 0%  | 0 | 0%  | 0 | 0%  |
| Endocrine disorders                                  |                        |      |   |     |   |     |   |     |   |     |
| Adrenal insufficiency                                | 0                      | 0%   | 1 | -2% | 0 | 0%  | 0 | 0%  | 0 | 0%  |
| Eye disorders                                        |                        |      |   |     |   |     |   |     |   |     |
| Uveitis                                              | 1                      | -2%  | 0 | 0%  | 0 | 0%  | 0 | 0%  | 0 | 0%  |
| Gastrointestinal disorders                           |                        |      |   |     |   |     |   |     |   |     |
| Constipation                                         | 4                      | -7%  | 0 | 0%  | 0 | 0%  | 0 | 0%  | 0 | 0%  |
| Diarrhea                                             | 3                      | -5%  | 0 | 0%  | 0 | 0%  | 0 | 0%  | 0 | 0%  |
| Dry mouth                                            | 1                      | -2%  | 0 | 0%  | 0 | 0%  | 0 | 0%  | 0 | 0%  |
| Mucositis oral                                       | 1                      | -2%  | 0 | 0%  | 0 | 0%  | 0 | 0%  | 0 | 0%  |
| Nausea                                               | 4                      | -7%  | 0 | 0%  | 0 | 0%  | 0 | 0%  | 0 | 0%  |
| Vomiting                                             | 2                      | -3%  | 0 | 0%  | 0 | 0%  | 0 | 0%  | 0 | 0%  |
| General disorders and administration site conditions |                        |      |   |     |   |     |   |     |   |     |
| Chills                                               | 3                      | -5%  | 0 | 0%  | 0 | 0%  | 0 | 0%  | 0 | 0%  |
| Edema face                                           | 1                      | -2%  | 0 | 0%  | 0 | 0%  | 0 | 0%  | 0 | 0%  |
| Edema limbs                                          | 2                      | -3%  | 0 | 0%  | 0 | 0%  | 0 | 0%  | 0 | 0%  |
| Fatigue                                              | 5                      | -8%  | 2 | -3% | 1 | -2% | 0 | 0%  | 0 | 0%  |
| Fever                                                | 1                      | -2%  | 0 | 0%  | 0 | 0%  | 0 | 0%  | 0 | 0%  |
| Injection site reaction                              | 1                      | -2%  | 0 | 0%  | 0 | 0%  | 0 | 0%  | 0 | 0%  |
| Localized edema                                      | 0                      | 0%   | 1 | -2% | 0 | 0%  | 0 | 0%  | 0 | 0%  |
| Malaise                                              | 1                      | -2%  | 0 | 0%  | 0 | 0%  | 0 | 0%  | 0 | 0%  |
| Infections and infestations                          |                        |      |   |     |   |     |   |     |   |     |
| Lung infection                                       | 0                      | 0%   | 1 | -2% | 0 | 0%  | 0 | 0%  | 0 | 0%  |
| Injury, poisoning and procedural complications       |                        |      |   |     |   |     |   |     |   |     |
| Infusion related reaction                            | 1                      | -2%  | 1 | -2% | 0 | 0%  | 0 | 0%  | 0 | 0%  |
| Investigations                                       |                        |      |   |     |   |     |   |     |   |     |
| Alanine aminotransferase increased                   | 6                      | -10% | 1 | -2% | 0 | 0%  | 0 | 0%  | 0 | 0%  |
| Alkaline phosphatase increased                       | 8                      | -13% | 0 | 0%  | 0 | 0%  | 0 | 0%  | 0 | 0%  |
| Aspartate aminotransferase increased                 | 2                      | -3%  | 1 | -2% | 1 | -2% | 0 | 0%  | 0 | 0%  |
| Blood bilirubin increased                            | 1                      | -2%  | 0 | 0%  | 0 | 0%  | 0 | 0%  | 0 | 0%  |
| Creatinine increased                                 | 2                      | -3%  | 1 | -2% | 0 | 0%  | 0 | 0%  | 0 | 0%  |
| Lymphocyte count decreased                           | 0                      | 0%   | 2 | -3% | 0 | 0%  | 0 | 0%  | 0 | 0%  |
| Platelet count decreased                             | 1                      | -2%  | 0 | 0%  | 0 | 0%  | 0 | 0%  | 0 | 0%  |
| Thyroid stimulating hormone increased                | 1                      | -2%  | 0 | 0%  | 0 | 0%  | 0 | 0%  | 0 | 0%  |
| Weight loss                                          | 1                      | -2%  | 0 | 0%  | 0 | 0%  | 0 | 0%  | 0 | 0%  |
| White blood cell decreased                           | 2                      | -3%  | 0 | 0%  | 0 | 0%  | 0 | 0%  | 0 | 0%  |
| Metabolism and nutrition disorders                   |                        |      |   |     |   |     |   |     |   |     |
| Anorexia                                             | 2                      | -3%  | 0 | 0%  | 0 | 0%  | 0 | 0%  | 0 | 0%  |
| Hyperkalemia                                         | 1                      | -2%  | 0 | 0%  | 0 | 0%  | 0 | 0%  | 0 | 0%  |

|                                                         |           |             |           |             |          |             |          |           |          |           |
|---------------------------------------------------------|-----------|-------------|-----------|-------------|----------|-------------|----------|-----------|----------|-----------|
| Hyponatremia                                            | 1         | -2%         | 0         | 0%          | 0        | 0%          | 0        | 0%        | 0        | 0%        |
| Metabolism and nutrition disorders - Other, specify     | 1         | -2%         | 0         | 0%          | 0        | 0%          | 0        | 0%        | 0        | 0%        |
| Musculoskeletal and connective tissue disorders         |           |             |           |             |          |             |          |           |          |           |
| Arthralgia                                              | 4         | -7%         | 1         | -2%         | 0        | 0%          | 0        | 0%        | 0        | 0%        |
| Back pain                                               | 1         | -2%         | 0         | 0%          | 0        | 0%          | 0        | 0%        | 0        | 0%        |
| Generalized muscle weakness                             | 0         | 0%          | 0         | 0%          | 1        | -2%         | 0        | 0%        | 0        | 0%        |
| Muscle cramp                                            | 2         | -3%         | 0         | 0%          | 0        | 0%          | 0        | 0%        | 0        | 0%        |
| Pain in extremity                                       | 1         | -2%         | 0         | 0%          | 0        | 0%          | 0        | 0%        | 0        | 0%        |
| Nervous system disorders                                |           |             |           |             |          |             |          |           |          |           |
| Dizziness                                               | 2         | -3%         | 0         | 0%          | 0        | 0%          | 0        | 0%        | 0        | 0%        |
| Dysgeusia                                               | 2         | -3%         | 0         | 0%          | 0        | 0%          | 0        | 0%        | 0        | 0%        |
| Guillain-Barre syndrome                                 | 0         | 0%          | 0         | 0%          | 1        | -2%         | 0        | 0%        | 0        | 0%        |
| Headache                                                | 1         | -2%         | 0         | 0%          | 0        | 0%          | 0        | 0%        | 0        | 0%        |
| Nervous system disorders - Other, specify               | 0         | 0%          | 1         | -2%         | 0        | 0%          | 0        | 0%        | 0        | 0%        |
| Paresthesia                                             | 1         | -2%         | 0         | 0%          | 0        | 0%          | 0        | 0%        | 0        | 0%        |
| Peripheral sensory neuropathy                           | 1         | -2%         | 1         | -2%         | 0        | 0%          | 0        | 0%        | 0        | 0%        |
| Reproductive system and breast disorders                |           |             |           |             |          |             |          |           |          |           |
| Genital edema                                           | 1         | -2%         | 0         | 0%          | 0        | 0%          | 0        | 0%        | 0        | 0%        |
| Respiratory, thoracic and mediastinal disorders         |           |             |           |             |          |             |          |           |          |           |
| Allergic rhinitis                                       | 2         | -3%         | 0         | 0%          | 0        | 0%          | 0        | 0%        | 0        | 0%        |
| Cough                                                   | 1         | -2%         | 1         | -2%         | 0        | 0%          | 0        | 0%        | 0        | 0%        |
| Dyspnea                                                 | 1         | -2%         | 1         | -2%         | 0        | 0%          | 0        | 0%        | 0        | 0%        |
| Skin and subcutaneous tissue disorders                  |           |             |           |             |          |             |          |           |          |           |
| Nail changes                                            | 1         | -2%         | 0         | 0%          | 0        | 0%          | 0        | 0%        | 0        | 0%        |
| Pruritus                                                | 3         | -5%         | 0         | 0%          | 0        | 0%          | 0        | 0%        | 0        | 0%        |
| Rash maculo-papular                                     | 5         | -8%         | 0         | 0%          | 0        | 0%          | 0        | 0%        | 0        | 0%        |
| Skin and subcutaneous tissue disorders - Other, specify | 2         | -3%         | 0         | 0%          | 0        | 0%          | 0        | 0%        | 0        | 0%        |
| Skin hypopigmentation                                   | 1         | -2%         | 0         | 0%          | 0        | 0%          | 0        | 0%        | 0        | 0%        |
| Vascular disorders                                      |           |             |           |             |          |             |          |           |          |           |
| Hot flashes                                             | 2         | -3%         | 0         | 0%          | 0        | 0%          | 0        | 0%        | 0        | 0%        |
| Hypotension                                             | 0         | 0%          | 0         | 0%          | 1        | -2%         | 0        | 0%        | 0        | 0%        |
| <b>Non-Hematologic Adverse Events</b>                   |           |             |           |             |          |             |          |           |          |           |
| Summary                                                 |           |             |           |             |          |             |          |           |          |           |
| <b>Maximum Non-Hematologic AE</b>                       | <b>19</b> | <b>-32%</b> | <b>13</b> | <b>-22%</b> | <b>7</b> | <b>-12%</b> | <b>0</b> | <b>0%</b> | <b>0</b> | <b>0%</b> |
| <b>All Adverse Events</b>                               |           |             |           |             |          |             |          |           |          |           |
| Summary                                                 |           |             |           |             |          |             |          |           |          |           |
| <b>Maximum Overall AE</b>                               | <b>19</b> | <b>-32%</b> | <b>13</b> | <b>-22%</b> | <b>7</b> | <b>-12%</b> | <b>0</b> | <b>0%</b> | <b>0</b> | <b>0%</b> |
