# Supplementary material for: Alirocumab Plus Cemiplimab in Immunorefractory NSCLC: A Single Arm Phase 2 Study
Source: Research Square preprint supplement (doi:10.21203/rs.3.rs-10011569/v1), 2026-06-24
Supplement: Supplementary file 8 [file 7d507312a09221c851028c18.pdf]

**Table 2. Summary of Treatment Related Adverse Events**

| <b>Adverse Events</b>                               | <b>Any grade <i>n</i> (%)</b> | <b>Grade <math>\geq</math> 3 <i>n</i> (%)</b> |
|-----------------------------------------------------|-------------------------------|-----------------------------------------------|
| Overall safety outcomes                             |                               |                                               |
| Dose limiting toxicities in stage I                 | 0 (0)                         | 0 (0)                                         |
| Treatment related adverse events*                   | 39 (65)                       | 7 (12)                                        |
| Grade 4 or 5 treatment related adverse events       | 0 (0)                         | 0 (0)                                         |
| Adverse events leading to dose modification         | 0 (0)                         | 0 (0)                                         |
| Adverse events leading to treatment discontinuation | 0 (0)                         | 2 (3.3)                                       |
| Most common adverse events                          |                               |                                               |
| >10% of patients                                    |                               |                                               |
| Anemia                                              | 13(22)                        | 3 (5)                                         |
| Fatigue                                             | 8 (13)                        | 1 (2)                                         |
| Alkaline phosphatase increased                      | 8 (13)                        | 0 (0)                                         |
| Alanine aminotransferase increased                  | 7 (12)                        | 0 (0)                                         |
| >5% of patients                                     |                               |                                               |
| Arthralgia                                          | 5 (8)                         | 0 (0)                                         |
| Rash (maculo-papular)                               | 5 (8)                         | 0 (0)                                         |
| Aspartate aminotransferase increased                | 4(7)                          | 1 (2)                                         |
| Other Grade 3 treatment related adverse events < 5% |                               |                                               |
| Hypotension                                         | 1 (2)                         | 1 (2)                                         |
| Generalized muscle weakness                         | 1 (2)                         | 1 (2)                                         |
| Guillane Barre Syndrome                             | 1 (2)                         | 1 (2)                                         |

\* includes all at least possibly treatment related adverse events
