# Supplementary material for: Alirocumab Plus Cemiplimab in Immunorefractory NSCLC: A Single Arm Phase 2 Study
Source: Research Square preprint supplement (doi:10.21203/rs.3.rs-10011569/v1), 2026-06-24
Supplement: Supplementary file 10 [file ad0ddcfa7e0dc34ae3c401aa.pdf]

# Extended Data Figure 3. Clinical Efficacy Evaluation by Histology

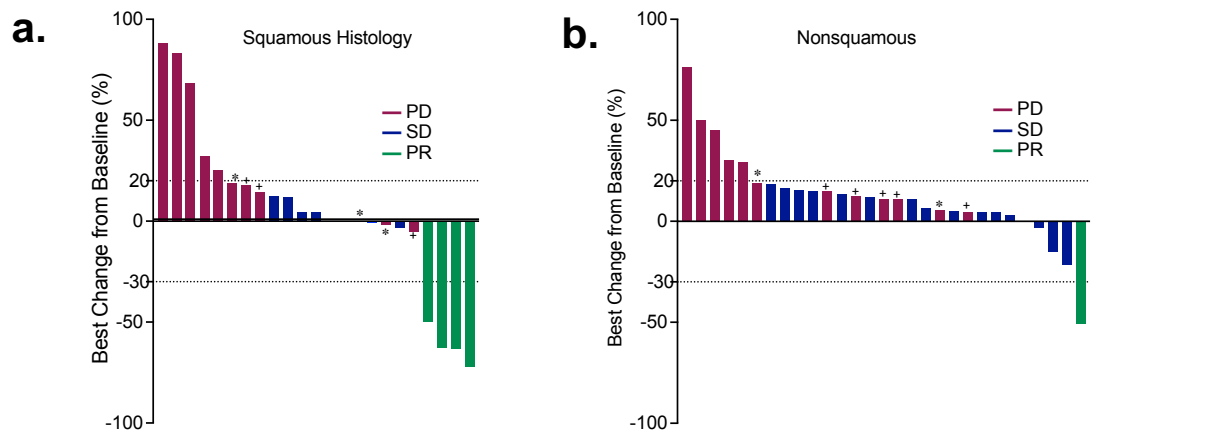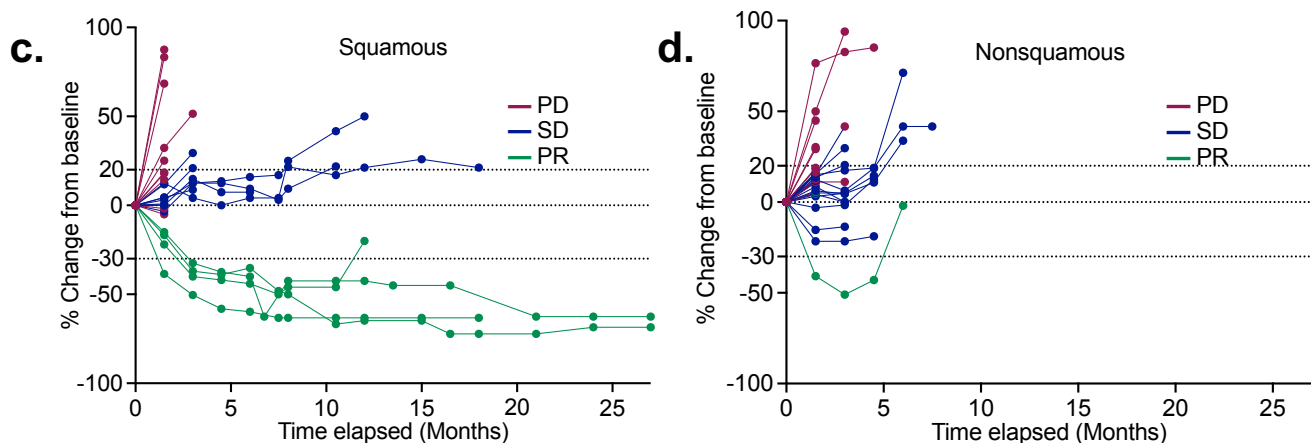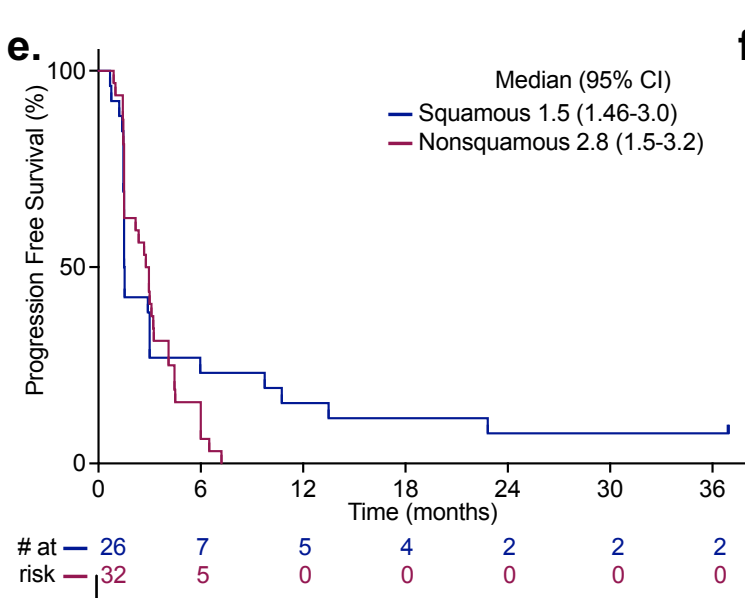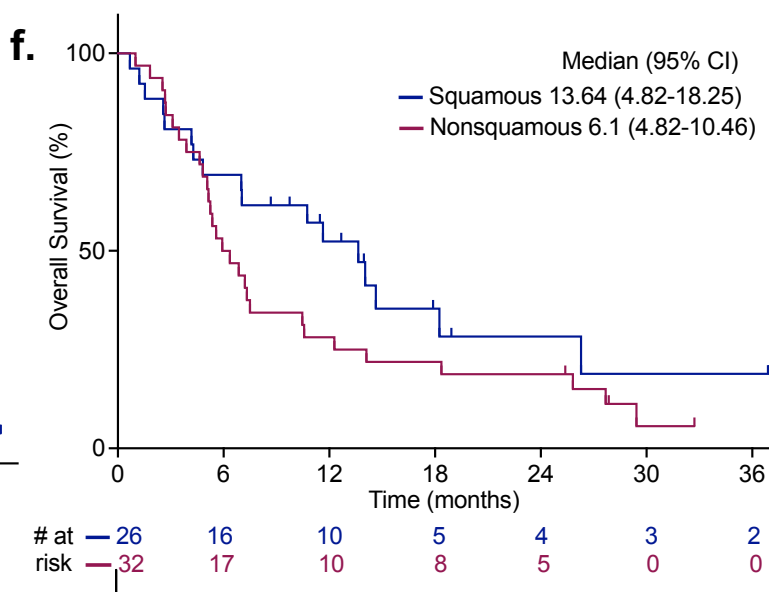

**a**, Waterfall plot of the best tumor change in squamous histology ( $n=23$ ; three patients with squamous NSCLC had no tumor measurements after baseline scans). **b**, Waterfall plot of the best change in target lesion in non-squamous histology ( $n=29$ ; three patients with non-squamous NSCLC had no tumor measurements after baseline scans). **c**, Spider plot illustrating the depth and duration of response from baseline by RECISTv 1.1 in squamous histology ( $n=23$ ). **d**, Spider plot illustrating the depth and duration of response from baseline by RECISTv 1.1 in non-squamous histology ( $n=29$ ). **e**, Kaplan–Meier curve of PFS estimate in all patients eligible for efficacy analysis according to histology ( $n=58$ ). **f**, Kaplan–Meier curve of OS in all patients eligible for efficacy analysis according to histology ( $n=58$ ).
