# Supplementary material for: Alirocumab Plus Cemiplimab in Immunorefractory NSCLC: A Single Arm Phase 2 Study
Source: Research Square preprint supplement (doi:10.21203/rs.3.rs-10011569/v1), 2026-06-24
Supplement: Supplementary file 11 [file d2f4ca89354da1d66f1b293b.pdf]

**Extended Data Figure 7. Manipulation of NSCLC cell lines without baseline PIK3CA, PTEN or AKT1 alterations by AKT1 inhibition exerts no significant changes in the tumor cell PCSK9 secretion.**

**a.**

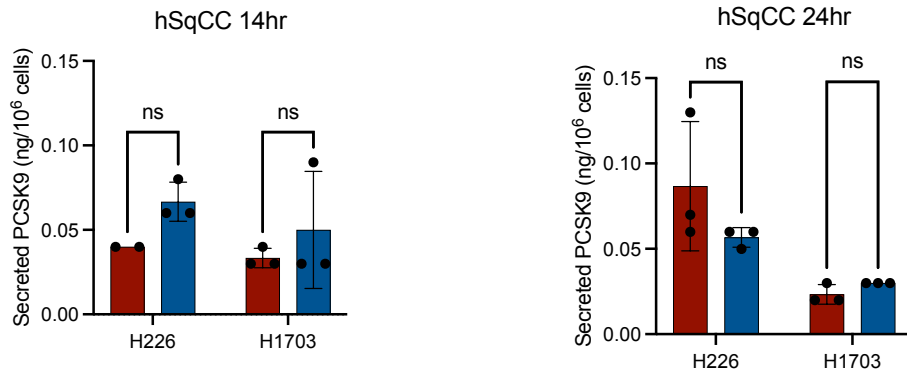

**b.**

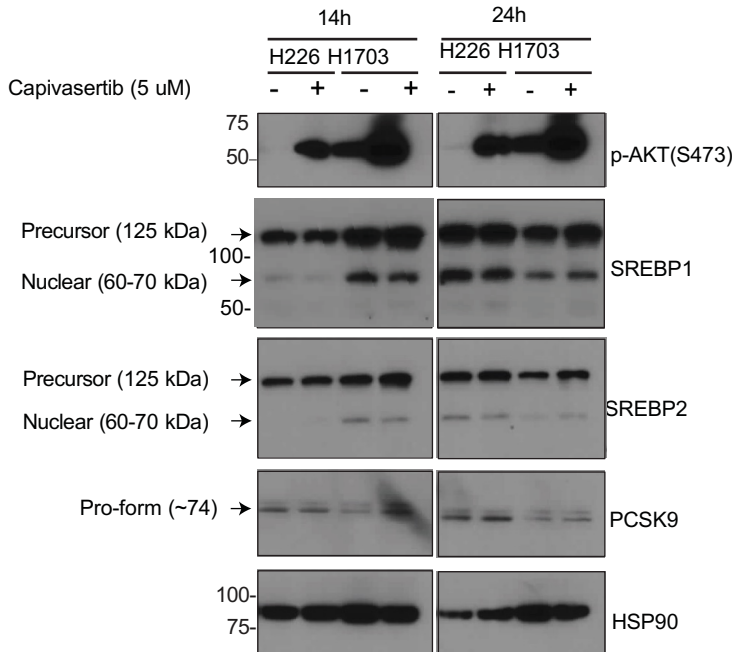

**a,** Representative ELISA results from indicated human squamous cell carcinoma (SqCC) cell lines H226 and H1703 that lack PI3K alterations. The cells were treated with DMSO or 5 uM capivasertib at indicated timepoints. Mixed-effects (14hr) or two-way ANOVA (24hr) with post-hoc uncorrected Fisher's LSD multiple comparisons. ns=not significant,  $p > 0.05$ . **b,** Corresponding cell lysates from the H226 and H1703 cell lines treated with or without capivasertib were immunoblotted with the indicated antibodies.
