# Supplementary material for: Alirocumab Plus Cemiplimab in Immunorefractory NSCLC: A Single Arm Phase 2 Study
Source: Research Square preprint supplement (doi:10.21203/rs.3.rs-10011569/v1), 2026-06-24
Supplement: Supplementary file 12 [file d518c16a5cf52bb086bdb5b4.pdf]

**Extended Table 2. Clinical Characteristics of Responders**

| Study ID   | Age | Gender | ECOG | Smoking Status | Days on Prior IO | Number of Prior Lines | Prior XRT History | PD-(L1) range (%) | LDL baseline | LDL at 6 weeks | LDL Change | Liver Mets | Histology   | Most recent preceding therapy       | Duration of response on anti-PCSK9 regimen |
|------------|-----|--------|------|----------------|------------------|-----------------------|-------------------|-------------------|--------------|----------------|------------|------------|-------------|-------------------------------------|--------------------------------------------|
| DUK2201-01 | >65 | Male   | 1    | Former         | <90              | 1                     | Yes               | >50 (65)          | <100         | <50            | >/=50      | N          | Squamous    | Platinum doublet with pembrolizumab | >24 months                                 |
| DUK2201-02 | >65 | Male   | 1    | Former         | >90              | 3                     | No                | 1-49 (2)          | <100         | <50            | >/=50      | N          | Squamous    | Gemcitabine                         | >24 months                                 |
| DUK2201-10 | >65 | Male   | 1    | Former         | >90              | 2                     | No                | >50 (80)          | <100         | <50            | <50        | N          | Squamous    | Pembrolizumab                       | 13.5 months                                |
| DUK2201-16 | <65 | Female | 0    | Never          | >90              | 1                     | No                | >50 (70)          | >100         | >50            | >/=50      | N          | Nonsquamous | Platinum doublet with pembrolizumab | 6 months                                   |
| DUK2201-21 | >65 | Male   | 1    | Former         | >90              | 3                     | No                | 1-49 (5)          | <100         | <50            | >/=50      | N          | Squamous    | GT103 plus Pembrolizumab            | 20 months                                  |
