# Supplementary material for: Alirocumab Plus Cemiplimab in Immunorefractory NSCLC: A Single Arm Phase 2 Study
Source: Research Square preprint supplement (doi:10.21203/rs.3.rs-10011569/v1), 2026-06-24
Supplement: Supplementary file 14 [file e13889fc493baf76b791b093.pdf]

## Extended Data Figure 2: CONSORT Diagram of Patient Disposition

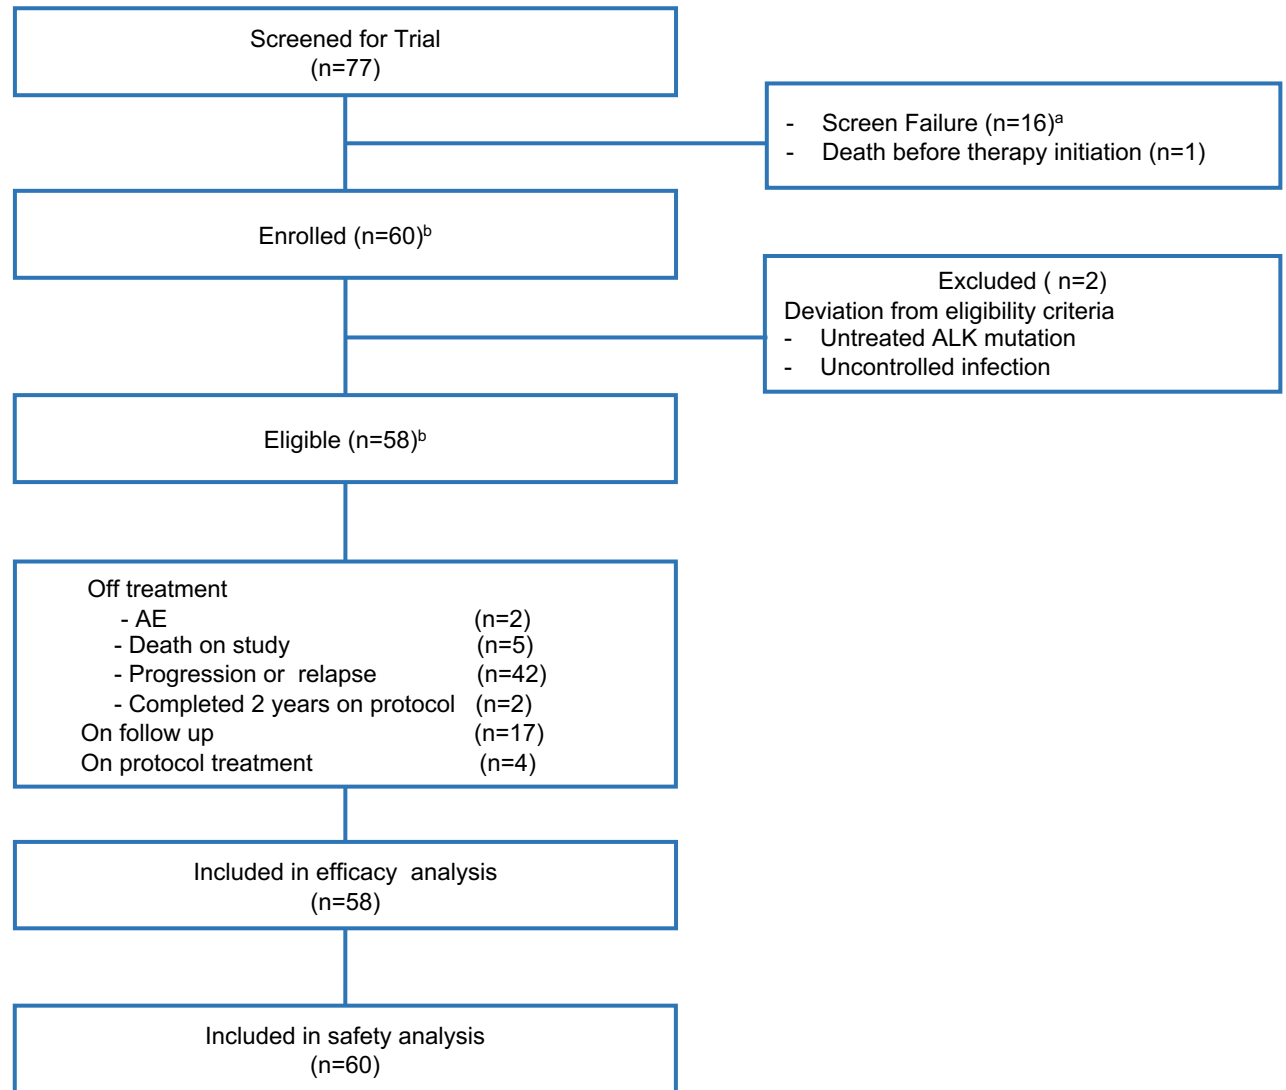

This figure illustrates the flow chart of the study. A total of 77 patients were screened for the study. Sixty patients were enrolled in the study and received at least 1 dose of study treatment. Fifty-eight patients were eligible for efficacy analysis. <sup>a</sup> Reasons for ineligibility detailed in Appendix 1. <sup>b</sup> Received at least 1 dose of PCSK9 inhibitor Alirocumab 150mg SC q2weeks (home injection) +/- PD-1 inhibitor Cemiplimab 350mg IV q3 weeks
