# Supplementary material for: Alirocumab Plus Cemiplimab in Immunorefractory NSCLC: A Single Arm Phase 2 Study
Source: Research Square preprint supplement (doi:10.21203/rs.3.rs-10011569/v1), 2026-06-24
Supplement: Supplementary file 15 [file eb13e840b5190e9655ac2e3a.pdf]

Extended Data Figure 5. Correlation of RNA-RNA Expression in TCGA NSCLC Cohorts.

**a.**

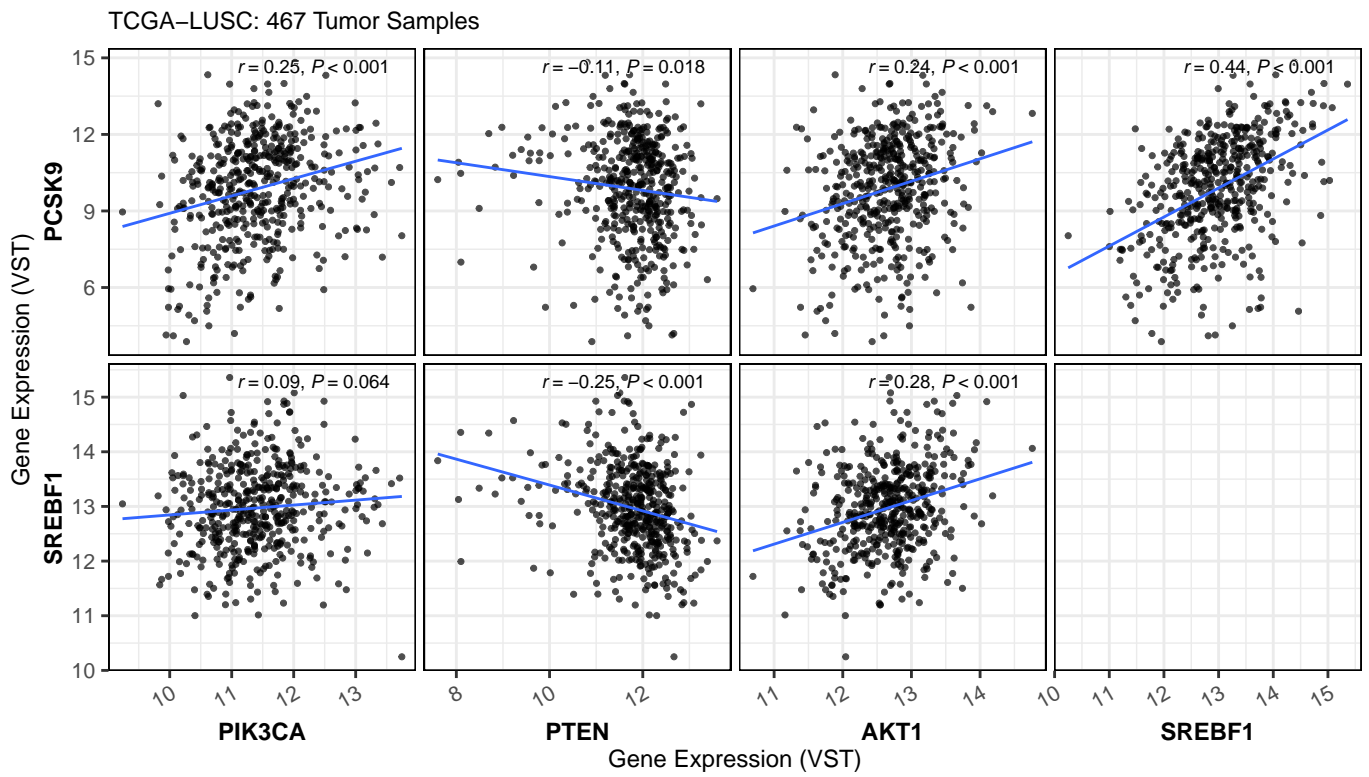

**b.**

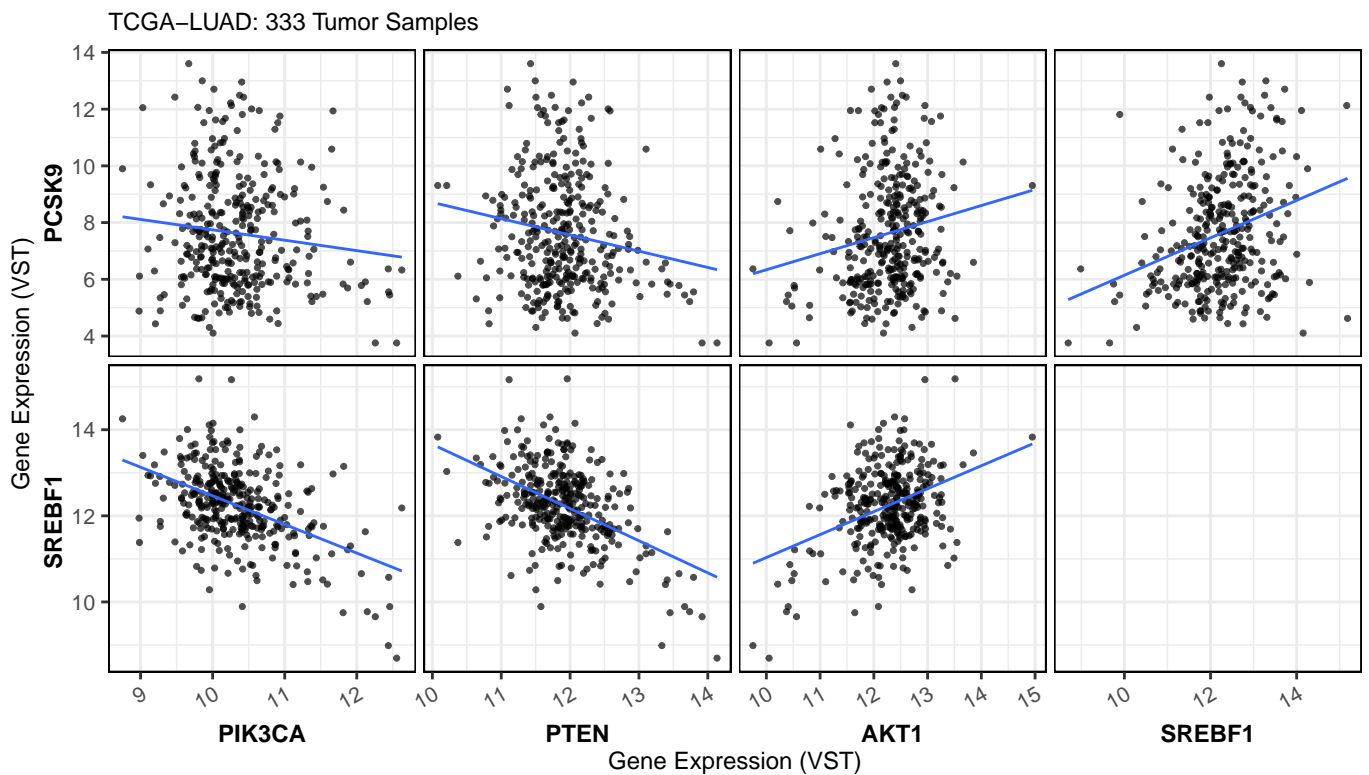

**a.** Correlation of PIK3CA, PTEN and AKT1 RNA expression with SREBP1 and PCSK9 RNA expression in the Lung Squamous Carcinoma (LUSC) cohort of The Cancer Genome Atlas (TCGA). **b.** Correlation of PIK3CA, PTEN and AKT1 RNA expression with SREBP1 and PCSK9 RNA expression in the Lung Adenocarcinoma (LUAD) cohort of TCGA.
