# Supplementary figures and images for: Alirocumab Plus Cemiplimab in Immunorefractory NSCLC: A Single Arm Phase 2 Study
Source: Research Square preprint supplement (doi:10.21203/rs.3.rs-10011569/v1), 2026-06-24

## Extended Data Figure 1: Study Design

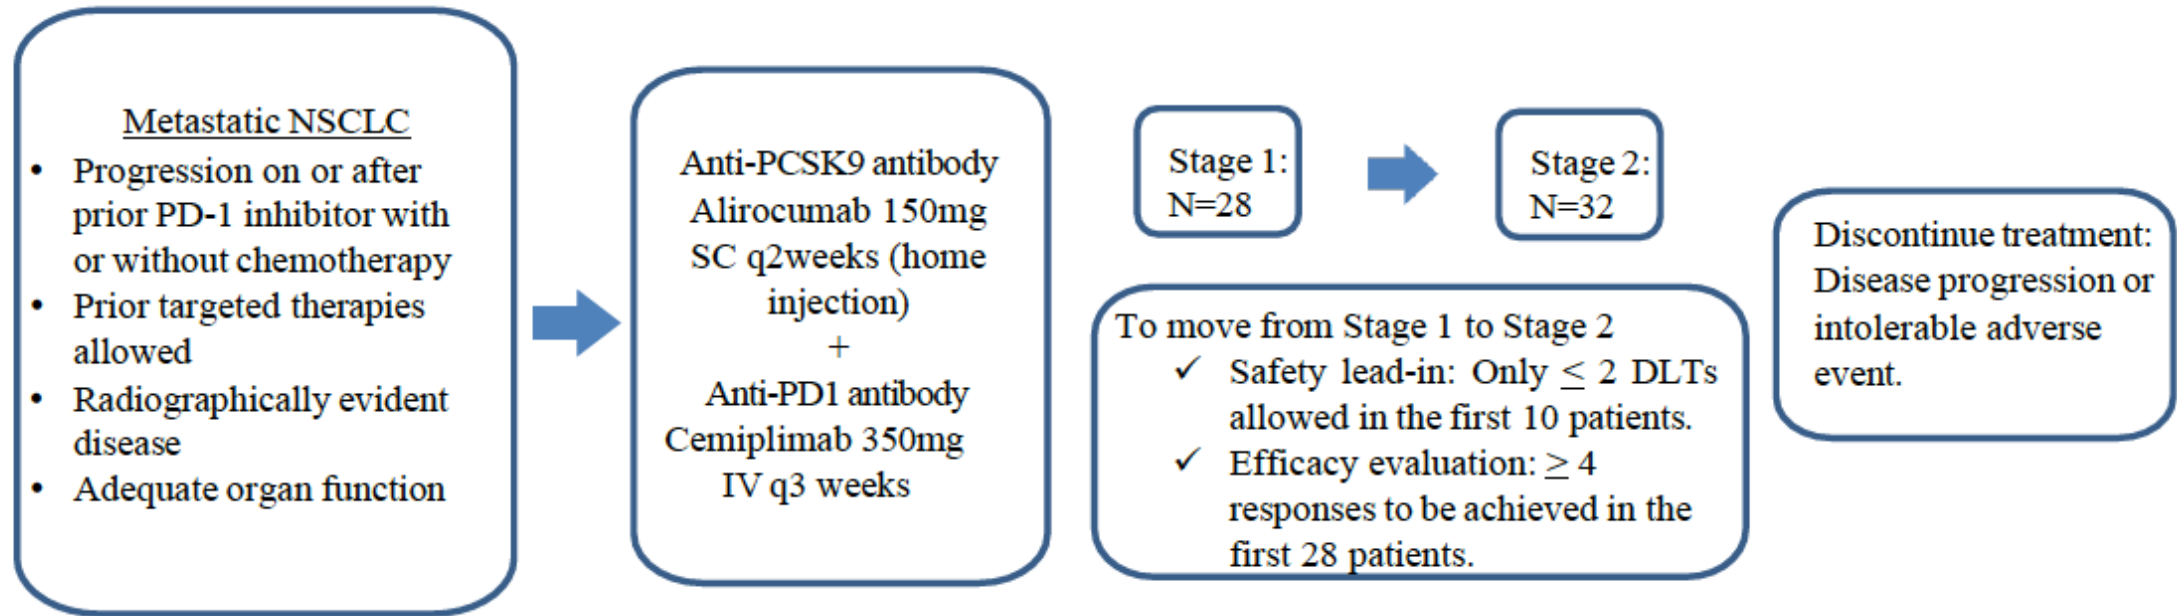

Supplement: Supplementary file 6 [file 7433effb505140037c87090d.pdf]
